# Supplementary material for: Hydrothermal synthesis of hexagonal CuSe nanoflakes with excellent sunlight-driven photocatalytic activity
Source: Royal Society of Chemistry journal article supplement (doi:10.1039/c4ce01470g), 2014-08-15
Supplement: c4ce01470g1.pdf [file c4ce01470g1.pdf]

## Supporting Information

### Hydrothermal synthesis of hexagonal CuSe nanoflakes with sunlight-driven photocatalytic activity

Yanjie Gu,<sup>ab</sup> Yanjie Su,<sup>\*a</sup> Da Chen,<sup>b</sup> Huijuan Geng,<sup>a</sup> Zhongli Li,<sup>a</sup> Luyin Zhang,<sup>b</sup>  
and Yafei Zhang<sup>\*a</sup>

<sup>a</sup> Key Laboratory for Thin Film and Microfabrication of the Ministry of Education,  
Department of Micro/Nano Electronics, Shanghai Jiao Tong University, Shanghai  
200240, PR China.

<sup>b</sup> College of Electronic, Communication and Physics, Shandong University of Science  
and Technology, Qingdao 266590, PR China.

#### 1 EDS spectrum of the as-synthesized CuSe nanoflakes

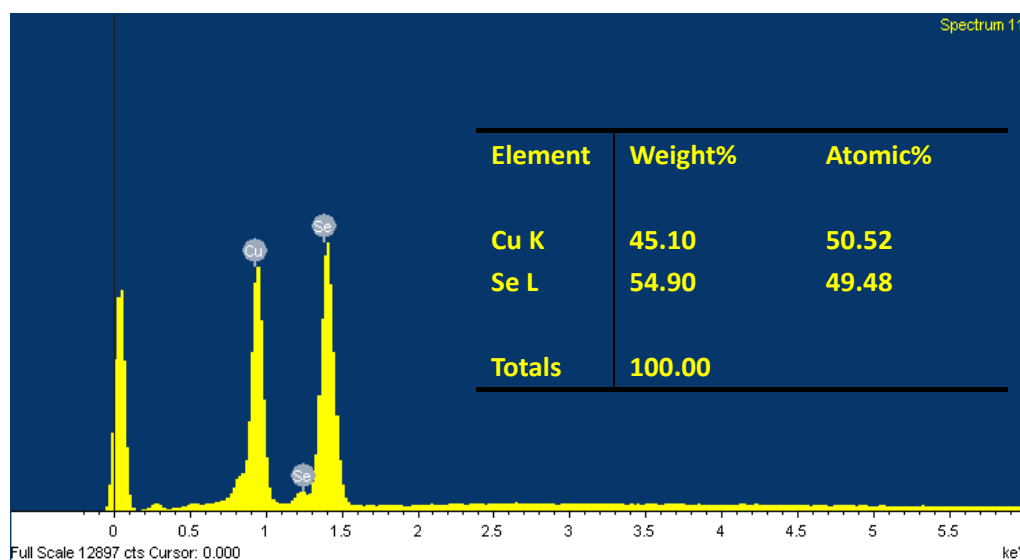

**Fig. S1** EDS spectrum of the as-synthesized CuSe nanoflakes

#### 2 SEM images of CuSe nanostructures synthesized using different Cu<sup>2+</sup> sources

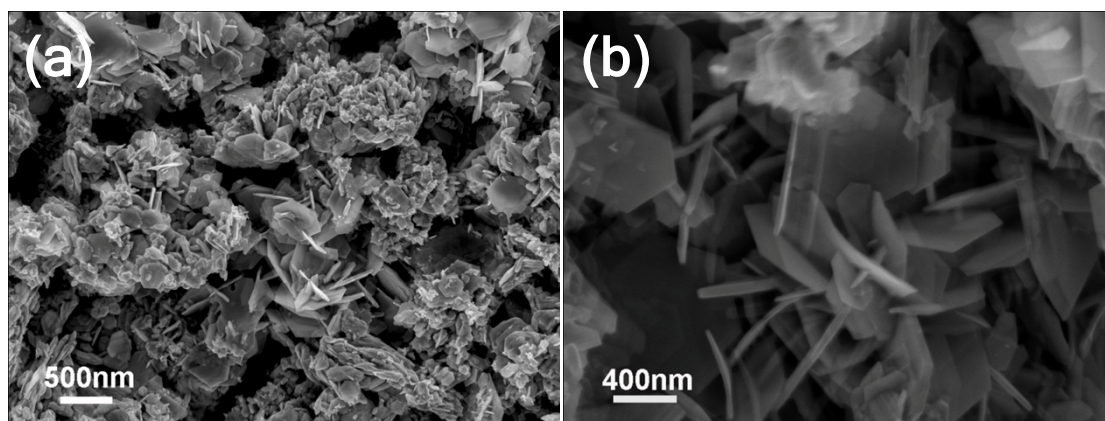

**Fig.S2** SEM images of CuSe nanostructures synthesized using (a)  $\text{CuCl}_2$  and  $\text{Cu}(\text{ac})_2$  as Cu source.

### 3 Characterizations of the intermediate product

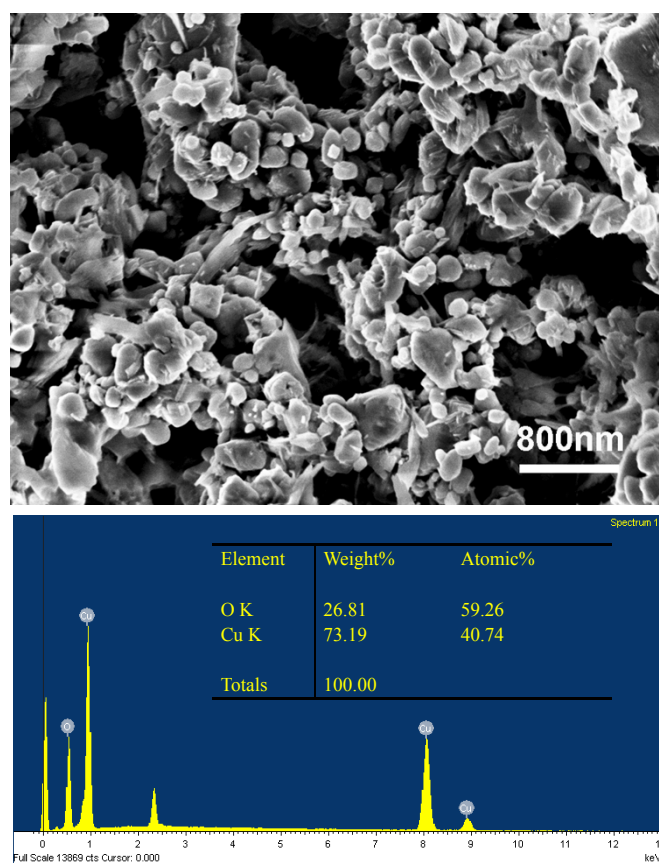

**Fig.S3** SEM image and EDS spectrum of intermediate product obtained by dissolving  $\text{CuCl}$  into concentrated  $\text{NaOH}$  solution without adding Se.

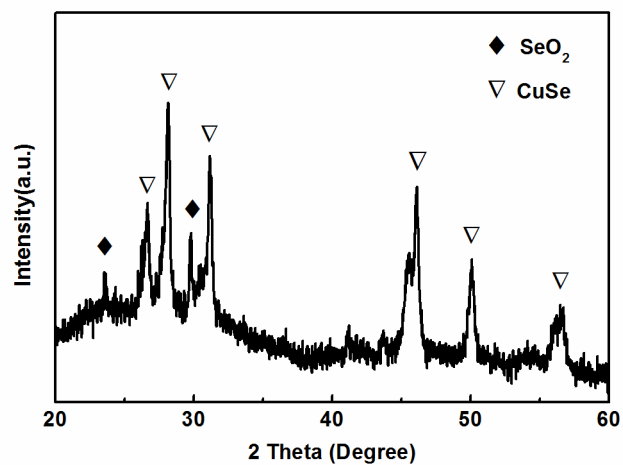

**Fig.S4** XRD spectrum of the intermediate product obtained by dissolving CuCl and Se into concentrated NaOH solution before hydrothermal treatments.

#### 4 Optical properties of CuSe nanostructures synthesized by different NaOH concentrations and PVP.

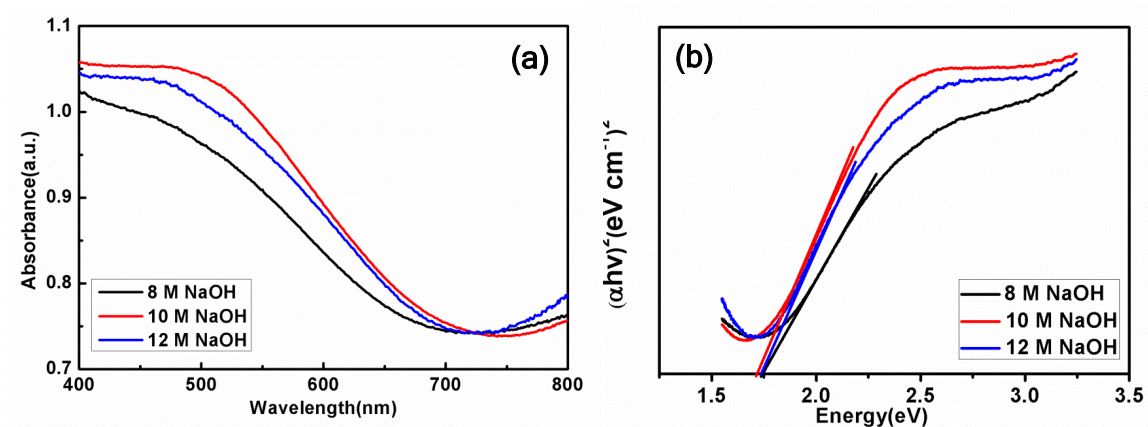

**Fig. S5** (a) UV-vis absorption spectrum and (b) plotted curve of  $(\alpha h\nu)^2$  against  $(h\nu)$  of the hexagonal CuSe nanoflakes with different NaOH concentrations.

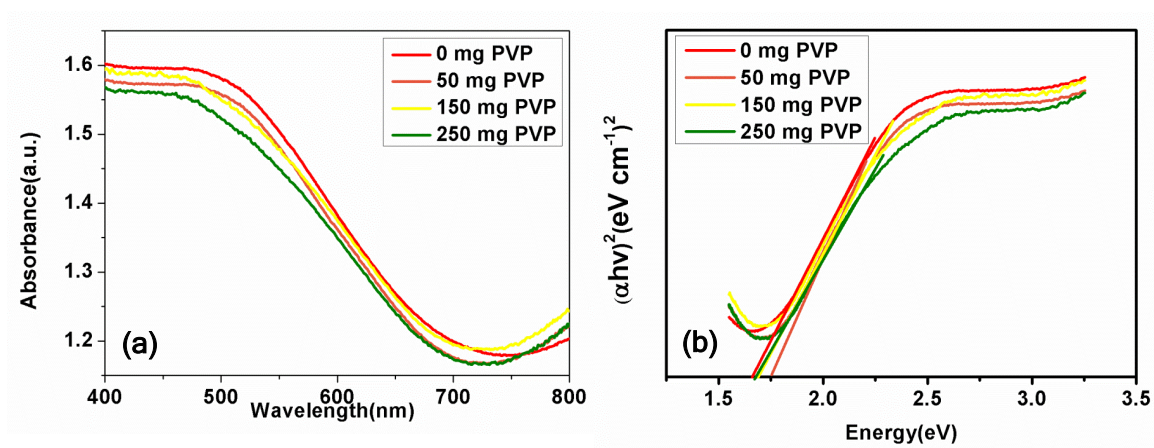

**Fig. S6** (a) UV-vis absorption spectra and (b) plotted curve of  $(\alpha h\nu)^2$  against  $(h\nu)$  of the hexagonal CuSe nanoflakes using different PVP.

## 6 The photocatalytic degradations of MB solution in the dark.

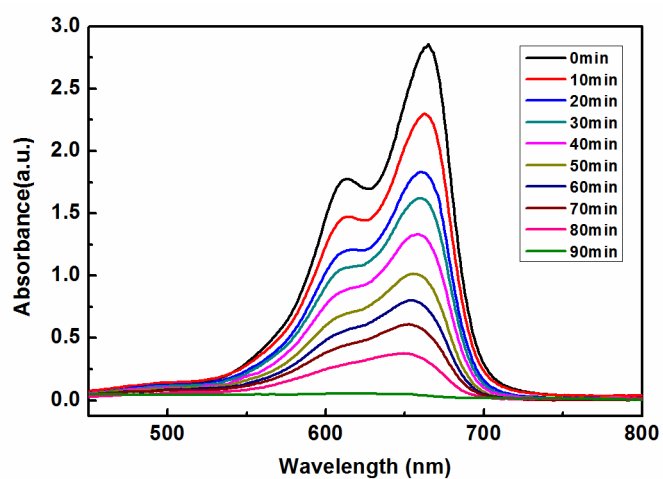

**Fig. S7** UV-visible absorption spectra of MB aqueous solution in the presence of hexagonal CuSe nanoflakes and H<sub>2</sub>O<sub>2</sub> in the dark.
